# Supplementary material for: A series of coordination polymers based on a 5-(3′-amine-1′H-pyrazol-4′-yl)-1H-tetrazole ligand: synthesis, structure and properties
Source: Royal Society of Chemistry journal article supplement (doi:10.1039/c3ce41462k), 2013-01-01
Supplement: c3ce41462k.pdf [file c3ce41462k.pdf]

## Supporting Information

### **A series of coordination polymers based on a 5-(3'-amine-1'H-pyrazol-4'-yl)-1H-tetrazole ligand: synthesis, structure and properties**

Li Tian,<sup>†,‡</sup> Zheng Niu,<sup>†</sup> Zhong-Yi Liu,<sup>‡</sup> Shang-Yong Zhou,<sup>‡</sup> and Peng Cheng<sup>\*†</sup>

<sup>†</sup>*Department of Chemistry, Nankai University, Tianjin 300071, Key Laboratory of Advanced Energy Materials Chemistry (MOE), P. R. China*

<sup>‡</sup>*Tianjin Key Laboratory of Structure and Performance for Functional Molecules; Key Laboratory of Inorganic-Organic Hybrid Functional Material Chemistry, Ministry of Education; College of Chemistry, Tianjin Normal University, Tianjin 300387, China*

#### **Catalogue:**

Table S1. Selected bonds length and angles for compounds **1-4**.

Figure S1. Molecule structure of **2**.

Figure S2. The 2D layer of **2**.

Figure S3. Molecule structure of **3**.

Figure S4. The 2D layer of **3**.

Figure S5. X-Ray powder diffraction patterns of **1**.

Figure S6. X-Ray powder diffraction patterns of **2**.

Figure S7. X-Ray powder diffraction patterns of **3**.

---

\* Corresponding author. E-mail: [pcheng@nankai.edu.cn](mailto:pcheng@nankai.edu.cn).

**Table S1. Selected Bond Lengths(Å) and Bond Angles (° deg) for 1-4**

| <b>1</b>             |            |                      |            |                     |          |
|----------------------|------------|----------------------|------------|---------------------|----------|
| Co(1)-N(1)           | 2.107(11)  | N(1)-Co(1)-N(4)#1    | 176.2(4)   | N(4)#1-Co(1)-N(14)  | 91.7(4)  |
| Co(1)-N(8)           | 2.112(11)  | N(8)-Co(1)-N(4)#1    | 87.0(4)    | N(11)#2-Co(1)-N(14) | 94.1(4)  |
| Co(1)-N(4)#1         | 2.160(12)  | N(1)-Co(1)-N(11)#2   | 86.0(4)    | N(1)-Co(1)-N(7)     | 82.9(4)  |
| Co(1)-N(11)#2        | 2.166(10)  | N(8)-Co(1)-N(11)#2   | 175.1(5)   | N(8)-Co(1)-N(7)     | 87.8(4)  |
| Co(1)-N(14)          | 2.232(11)  | N(4)#1-Co(1)-N(11)#2 | 97.8(4)    | N(4)#1-Co(1)-N(7)   | 97.2(4)  |
| Co(1)-N(7)           | 2.258(13)  | N(1)-Co(1)-N(14)     | 87.8(4)    | N(11)#2-Co(1)-N(7)  | 92.0(4)  |
| N(1)-Co(1)-N(8)      | 89.2(4)    | N(8)-Co(1)-N(14)     | 85.3(4)    | N(14)-Co(1)-N(7)    | 168.4(5) |
| <b>2</b>             |            |                      |            |                     |          |
| Zn(1)-N(8)           | 2.136(11)  | N(4)#1-Zn(1)-N(11)#2 | 98.9(4)    | N(1)-Zn(1)-N(14)    | 87.1(4)  |
| Zn(1)-N(4)#1         | 2.160(10)  | N(8)-Zn(1)-N(1)      | 88.4(4)    | N(8)-Zn(1)-N(7)     | 86.4(4)  |
| Zn(1)-N(11)#2        | 2.162(11)  | N(4)#1-Zn(1)-N(1)    | 175.0(4)   | N(4)#1-Zn(1)-N(7)   | 97.7(4)  |
| Zn(1)-N(14)          | 2.217(11)  | N(11)#2-Zn(1)-N(1)   | 86.2(4)    | N(11)#2-Zn(1)-N(7)  | 92.0(4)  |
| Zn(1)-N(7)           | 2.307(12)  | N(8)-Zn(1)-N(14)     | 85.2(4)    | N(1)-Zn(1)-N(7)     | 82.2(4)  |
| N(8)-Zn(1)-N(4)#1    | 86.6(4)    | N(4)#1-Zn(1)-N(14)   | 92.2(4)    | N(14)-Zn(1)-N(7)    | 166.5(4) |
| N(8)-Zn(1)-N(11)#2   | 174.5(4)   | N(11)#2-Zn(1)-N(14)  | 95.5(4)    |                     |          |
| <b>3</b>             |            |                      |            |                     |          |
| Cd(1)-N(11)#2        | 2.319(7)   | N(11)#2-Cd(1)-N(8)   | 172.3(3)   | N(8)-Cd(1)-N(14)    | 80.4(2)  |
| Cd(1)-N(4)#3         | 2.325(7)   | N(4)#3-Cd(1)-N(8)    | 84.9(2)    | N(1)-Cd(1)-N(14)    | 88.3(3)  |
| Cd(1)-N(8)           | 2.327(7)   | N(11)#2-Cd(1)-N(1)   | 85.7(2)    | N(11)#2-Cd(1)-N(7)  | 91.7(2)  |
| Cd(1)-N(1)           | 2.373(7)   | N(4)#3-Cd(1)-N(1)    | 171.5(2)   | N(4)#3-Cd(1)-N(7)   | 101.9(2) |
| Cd(1)-N(14)          | 2.410(7)   | N(8)-Cd(1)-N(1)      | 86.6(2)    | N(8)-Cd(1)-N(7)     | 87.0(2)  |
| Cd(1)-N(7)           | 2.486(8)   | N(11)#2-Cd(1)-N(14)  | 98.8(2)    | N(1)-Cd(1)-N(7)     | 77.2(2)  |
| N(11)#2-Cd(1)-N(4)#3 | 102.8(2)   | N(4)#3-Cd(1)-N(14)   | 90.7(3)    | N(14)-Cd(1)-N(7)    | 161.4(3) |
| <b>4</b>             |            |                      |            |                     |          |
| Cu(1)-N(1)           | 1.990(2)   | N(1)-Cu(1)-N(7)#1    | 87.99(10)  | N(1)#1-Cu(1)-N(3)#2 | 93.54(8) |
| Cu(1)-N(1)#1         | 1.990(2)   | N(1)#1-Cu(1)-N(7)#1  | 92.01(10)  | N(7)#1-Cu(1)-N(3)#2 | 90.09(9) |
| Cu(1)-N(7)#1         | 2.069(2)   | N(1)-Cu(1)-N(7)      | 92.01(10)  | N(7)-Cu(1)-N(3)#2   | 89.91(9) |
| Cu(1)-N(7)           | 2.069(2)   | N(1)#1-Cu(1)-N(7)    | 87.99(10)  | N(1)-Cu(1)-N(3)#3   | 86.46(8) |
| Cu(1)-N(3)#2         | 2.462(2)   | N(7)#1-Cu(1)-N(7)    | 180.0      | N(7)#1-Cu(1)-N(3)#3 | 89.91(9) |
| Cu(1)-N(3)#3         | 2.462(2)   | N(1)-Cu(1)-N(7)      | 174.70(10) | N(7)-Cu(1)-N(3)#3   | 90.09(9) |
| N(1)-Cu(1)-N(1)#1    | 180.000(9) | N(1)-Cu(1)-N(3)#2    | 86.46(8)   | N(3)#2-Cu(1)-N(3)#3 | 180.00   |

**Symmetry transformations used to generate equivalent atoms:**

- 1,** #1  $x, -y+3/2, z-1/2$  #2  $x+1, -y+3/2, z+1/2$  #3  $x, -y+3/2, z+1/2$  #4  $x-1, -y+3/2, z-1/2$   
**2,** #1  $x+1, -y+3/2, z+1/2$  #2  $x, -y+3/2, z-1/2$  #3  $x-1, -y+3/2, z-1/2$  #4  $x, -y+3/2, z+1/2$   
**3,** #1  $x+1, -y+3/2, z+1/2$  #2  $x, -y+3/2, z-1/2$  #3  $x, -y+3/2, z+1/2$  #4  $x-1, -y+3/2, z-1/2$   
**4,** #1  $-x, -y+1, -z+1$  #2  $-x, y+1/2, -z+1/2$  #3  $x, -y+1/2, z+1/2$  #4  $-x, y-1/2, -z+1/2$

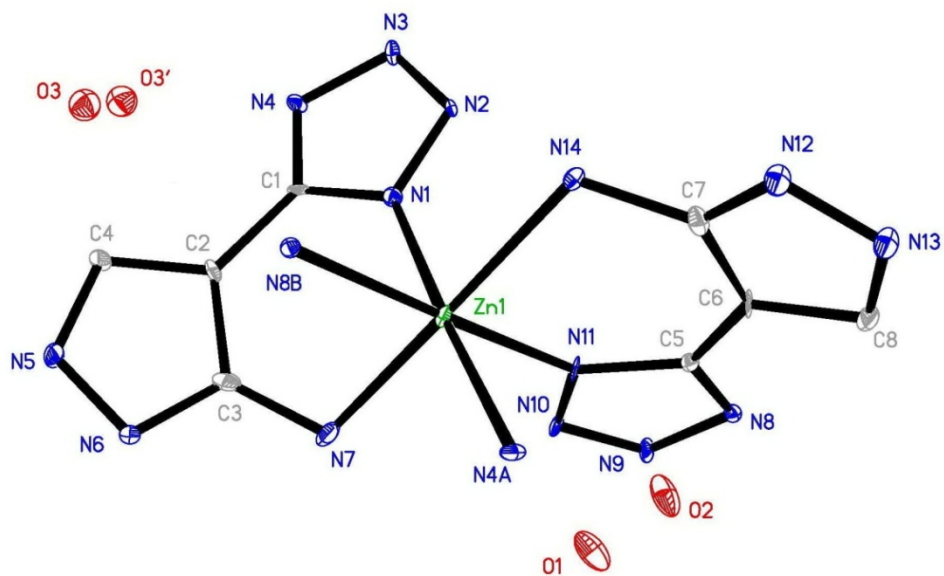

**Figure S1.** Molecule structure of **2**, showing the coordination environments of  $\text{Zn}^{\text{II}}$  and  $\text{H}_2\text{apt}$  ligands. Symmetry operator: A =  $x, 1.5-y, -0.5+z$ ; B =  $1+x, 1.5-y, 0.5+z$ .

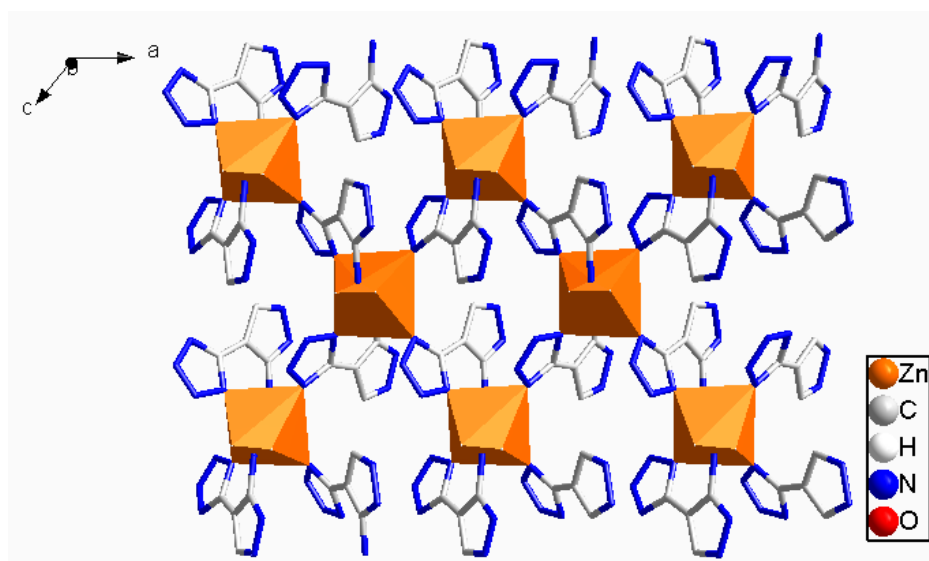

**Figure S2.** The 2D layer of **2**.

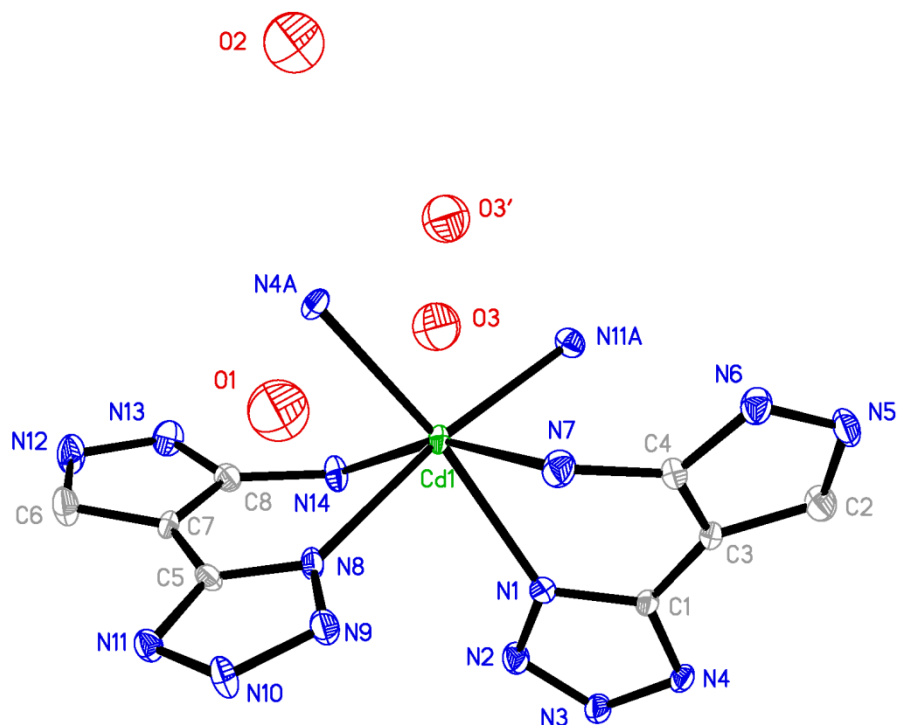

**Figure S3.** Molecule structure of **3**, showing the coordination environments of Cd<sup>II</sup> and H<sub>2</sub>apt ligands. Symmetry operator: A =  $-0.5+x, 0.5-y, -0.5+z$ ; B =  $-0.5+x, 0.5-y, 0.5+z$ .

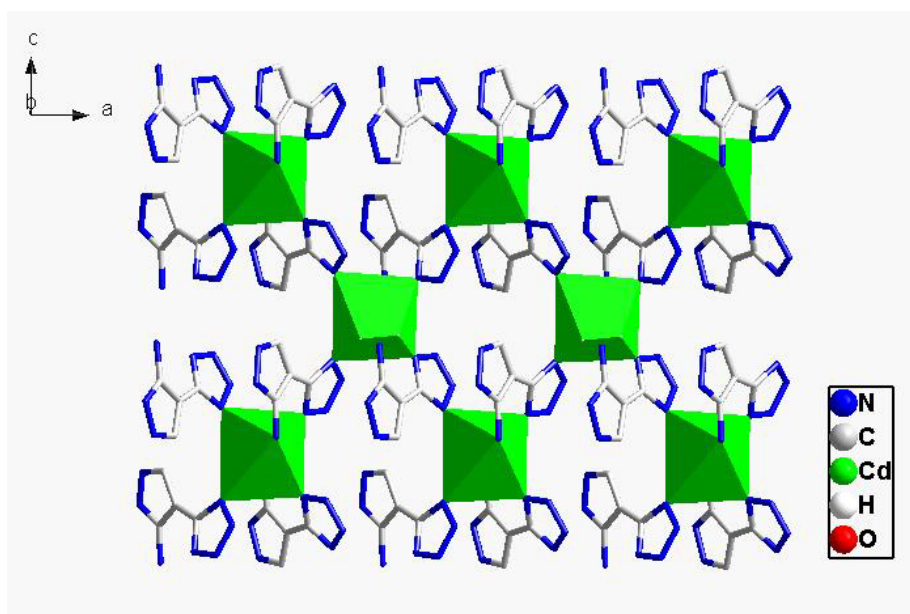

**Figure S4.** The 2D layer of **3**.

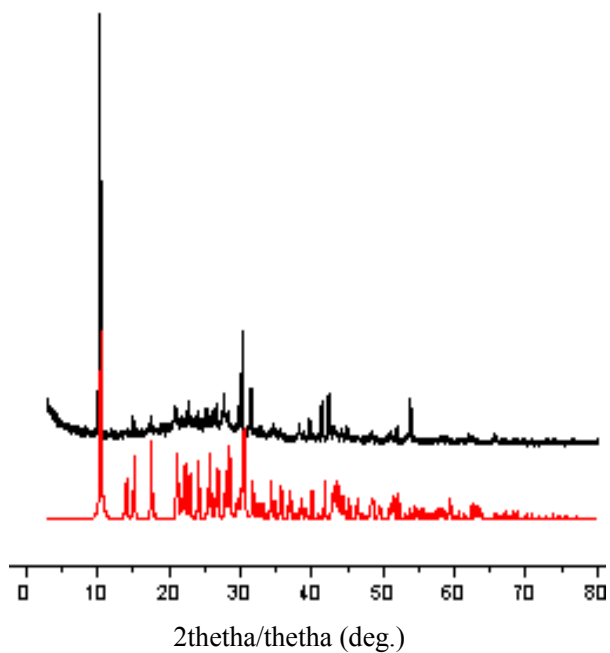

**Figure S5.** X-Ray powder diffraction patterns of **1**. Black line (experiment); red line (simulation) .

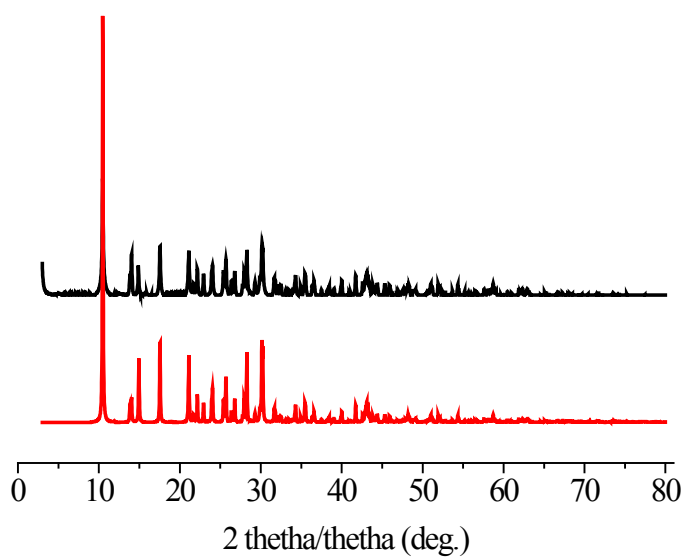

**Figure S6.** X-Ray powder diffraction patterns of **2**. Black line (experiment); red line (simulation) .

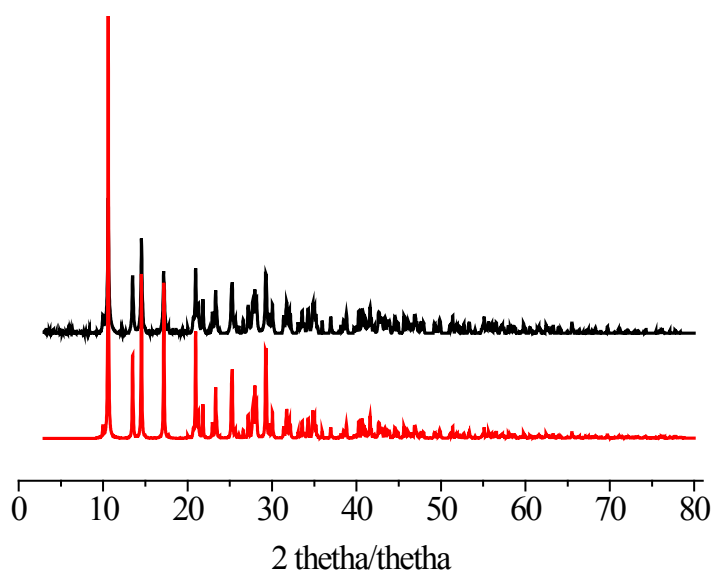

**Figure S7.** X-Ray powder diffraction patterns of **3**. Black line (experiment); red line (simulation) .
